# Supplementary material
Source: PubMed Central journal article supplement (PMC6368979)
Supplement: NIHMS1009003-supplement-Supporting_Information.pdf [file NIHMS1009003-supplement-Supporting_Information.pdf]

## Supplementary Information

### Structural polymorphs suggest competing pathways for the formation of amyloid fibrils that diverge from a common intermediate species

Lauren E. Buchanan<sup>1,†,‡</sup>, Michał Maj<sup>1,†</sup>, Emily B. Dunkelberger<sup>1,§</sup>, Pin-Nan Cheng<sup>2</sup>, James S. Nowick<sup>2</sup>, Martin T. Zanni<sup>1\*</sup>

<sup>1</sup>Department of Chemistry, University of Wisconsin-Madison, Madison, WI 53706-1396.

<sup>2</sup> Department of Chemistry, University of California-Irvine, Irvine, CA 92697-2025.

\*Correspondence to: zanni@chem.wisc.edu

## Supplemental Methods

**Fitting of Diagonal Slices.** Diagonal slices were fit to a sum of pseudo-Voigt functions.<sup>1</sup> The unlabeled region of the spectrum was fit with two functions: one centered around 1620  $\text{cm}^{-1}$  with a FWHM of 10-15  $\text{cm}^{-1}$ , which corresponds to the amyloid  $\beta$ -sheet mode, and one centered around 1630-1640  $\text{cm}^{-1}$  with a FWHM of 30-60  $\text{cm}^{-1}$ , which accounts for disordered structures and scatter. These were added together to create the green trace shown in Figures 1, 3, and S2. The isotope-labeled peaks were each fit with their own functions, which are shown in either red or blue. The frequencies of the isotope-labeled peaks vary between 1570 and 1594  $\text{cm}^{-1}$ , depending on the extent of coupling at that position. Frequency and FWHM parameters for the isotope-labeled peaks are given in the Table S1. For quantitative comparison of the polymorph populations in Figure 3, the FWHM of the fits for the isotope-labeled modes were held constant across all scans. A FWHM of 7.91  $\text{cm}^{-1}$  was used for the lower frequency mode (blue trace) and a FWHM of 10.14  $\text{cm}^{-1}$  was used for the higher frequency mode (red trace). The peak area was determined for both modes and used to calculate the low-frequency to high-frequency peak area ratio discussed in the main text.

**Table S1.** Fitting parameters for the various isotope-labeled positions.

| Label position               | Frequency ( $\text{cm}^{-1}$ ) | FWHM ( $\text{cm}^{-1}$ ) |
|------------------------------|--------------------------------|---------------------------|
| Val17                        | 1583                           | 19.76                     |
| Phe23                        | 1593                           | 13.95                     |
| Ala25                        | 1570 / 1585                    | 7.91 / 10.14              |
| Ala25 – 2.5% HFIP            | 1586                           | 14.98                     |
| Ala25 – 1:3 isotope dilution | 1593                           | 21.91                     |
| Gly24                        | 1586                           | 13.55                     |
| Leu27                        | 1580 / 1594 (weak)             | 21.91 / 8.80              |
| Gly33                        | 1583 / 1593 (weak)             | 11.43 / 8.04              |

## Supplemental Data

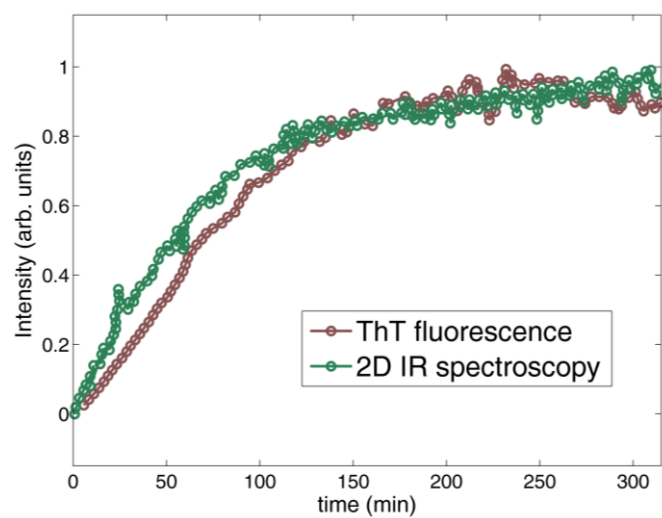

**Figure S1.** Intensity changes of the unlabeled  $\beta$ -sheet feature extracted from 2D IR spectra and ThT fluorescence plotted as a function of aggregation time.

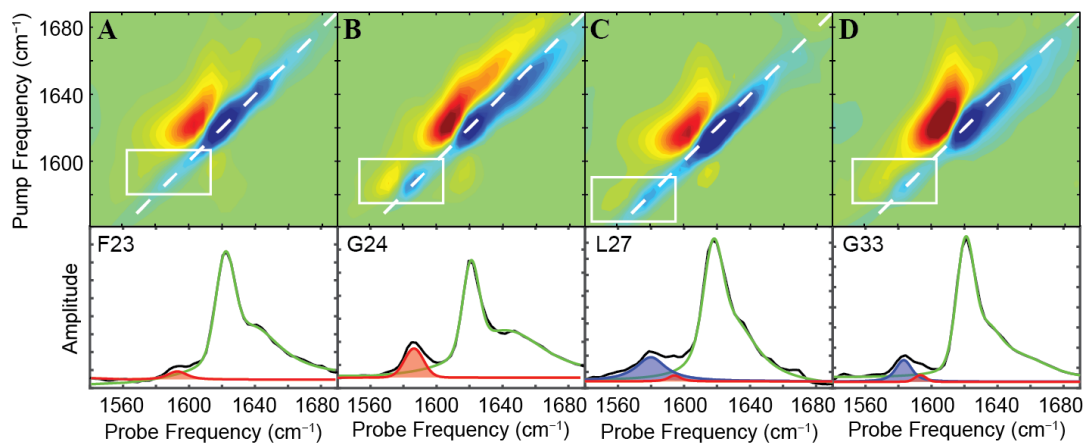

**Figure S2.** 2D IR spectra measured for four labels not discussed in the main text: Phe23, Gly24, Leu27 and Gly33. All spectra show a single isotope peak, contrary to Ala25. Spectra were measured in the absence of macrocycles. This data was previously reported in Buchanan, L. E., *et al. Proc. Natl. Acad. Sci. U. S. A.* **2013**, *110*, 19285, but additional analysis has been performed for this study.

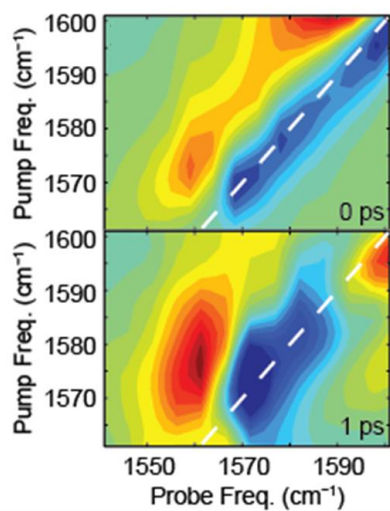

**Figure S3.** 2D IR spectra of Ala25 isotope modes at 0 ps (top) and 1 ps (bottom) waiting time.

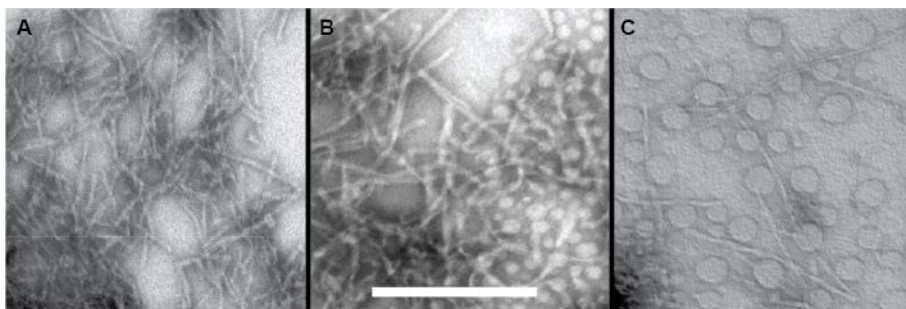

**Figure S4.** TEM images of hIAPP fibrils. TEM images of equilibrated fibrils of (A) pure hIAPP and hIAPP fibrils formed in the presence of (B) seeding macrocycle Mac<sub>26-32</sub> and (C) inhibiting macrocycle Mac<sub>21-27</sub>. The large spheres are likely aggregated macrocycles (2). The scale bar is the same for each image and represents 200 nm. This data was previously reported in Buchanan, L. E., *et al. Proc. Natl. Acad. Sci. U. S. A.* **2013**, *110*, 19285.

## Reference

(1) Ida, T., Ando, M., and Toraya, H. (2000) Extended pseudo-Voigt function for approximating the Voigt profile. *J. Appl. Crystallogr.* *33*, 1311–1316.
